# Supplementary material for: Vitamin D Levels in COVID-19 Outpatients from Western Mexico: Clinical Correlation and Effect of Its Supplementation
Source: MDPI journal article supplement (doi:10.3390/jcm10112378), 2021-05-28
Supplement: s1 [file s1]

**Supplementary Table S1.** Comparison of symptoms in supplemented and non-supplemented outpatients study groups at baseline and follow-up at days 7 and 14

| Variable                                        | Base-line                            |                                             |             | 7 days                               |                                             |             | 14 days                              |                                             |             |
|-------------------------------------------------|--------------------------------------|---------------------------------------------|-------------|--------------------------------------|---------------------------------------------|-------------|--------------------------------------|---------------------------------------------|-------------|
|                                                 | Supplemente<br>d outpatients<br>n=22 | Non-<br>supplemented<br>outpatients<br>n=20 | p-<br>value | Supplemente<br>d outpatients<br>n=22 | Non-<br>supplemented<br>outpatients<br>n=20 | p-<br>value | Supplemente<br>d outpatients<br>n=22 | Non-<br>supplemented<br>outpatients<br>n=20 | p-<br>value |
| Fever <sup>a</sup>                              | 9 (40.9)                             | 8 (40.0)                                    | 0.95        | 0 (0.0)                              | 2 (10.0)                                    | 0.22        | 0 (0.0)                              | 2 (10.0)                                    | 0.22        |
| Headache <sup>a</sup>                           | 14 (64.3)                            | 13 (65.0)                                   | 0.93        | 4 (18.2)                             | 3 (15.0)                                    | 1.00        | 4 (18.2)                             | 3 (15.0)                                    | 1.00        |
| Loss of smell <sup>a</sup>                      | 10 (45.5)                            | 11 (55.0)                                   | 0.54        | 3 (13.6)                             | 1 (50.0)                                    | 0.61        | 3 (13.6)                             | 1 (5.0)                                     | 0.61        |
| Dry cough <sup>a</sup>                          | 13 (59.1)                            | 15(75.0)                                    | 0.27        | 4 (18.2)                             | 4(20.0)                                     | 1.00        | 4 (18.2)                             | 4 (20.0)                                    | 1.00        |
| Sore throat <sup>a</sup>                        | 6 (27.3)                             | 7 (35.0)                                    | 0.58        | 1 (4.5)                              | 0 (0.0)                                     | 1.00        | 1 (4.5)                              | 0 (0.0)                                     | 1.00        |
| Ageusia <sup>a</sup>                            | 10 (45.5)                            | 12 (60.0)                                   | 0.34        | 3 (13.6)                             | 4 (20.0)                                    | 0.69        | 3 (13.6)                             | 4 (20.0)                                    | 0.69        |
| Runny nose <sup>a</sup>                         | 3 (13.6)                             | 5 (25.0)                                    | 0.44        | 0 (0.0)                              | 1 (5.0)                                     | 0.48        | 0 (0.0)                              | 0 (0.0)                                     | ---         |
| Nausea or <sup>a</sup><br>Vomiting <sup>a</sup> | 3 (13.6)                             | 6 (30.0)                                    | 0.27        | 0 (0.0)                              | 3 (15.0)                                    | 0.09        | 0 (0.0)                              | 3 (15.0)                                    | 0.09        |
| Tiredness <sup>a</sup>                          | 8 (36.4)                             | 12 (60.0)                                   | 0.13        | 4 (18.2)                             | 4 (20.0)                                    | 1.00        | 5 (22.7)                             | 4 (20.0)                                    | 1.00        |
| Diarrhoea <sup>a</sup>                          | 5 (22.7)                             | 2 (25.0)                                    | 1.00        | 0 (0.0)                              | 1 (5.0)                                     | 0.48        | 0 (0.0)                              | 0 (0.0)                                     | ---         |
| Myalgia <sup>a</sup>                            | 12 (54.5)                            | 20 (60.0)                                   | 0.72        | 1 (4.5)                              | 2 (10.0)                                    | 0.60        | 1 (4.5)                              | 2 (10.0)                                    | 0.60        |
| Arthralgia <sup>a</sup>                         | 8 (36.4)                             | 12 (60.0)                                   | 0.13        | 0 (0.0)                              | 0 (0.0)                                     | ---         | 0 (0.0)                              | 0 (0.0)                                     | ---         |
| Shortness of<br>breath <sup>a</sup>             | 2 (9.1)                              | 0 (0.0)                                     | 0.48        | 0 (0.0)                              | 3 (15.0)                                    | 0.09        | 0 (0.0)                              | 0 (0.0)                                     | ---         |

a= Qualitative variables are expressed as frequency and percentages. *p*-values with statistical significance are highlighted in bold. Chi square test o Fisher exact test was performed for comparison of qualitative variables  $p \leq 0.05$ .
